# Supplementary material for: Effects of elevated pCO2 and nutrient enrichment on the growth, photosynthesis, and biochemical compositions of the brown alga Saccharina japonica (Laminariaceae, Phaeophyta)
Source: PeerJ. 2019 Nov 27;7:e8040. doi: 10.7717/peerj.8040 (PMC6884996; doi:10.7717/peerj.8040)
Supplement: Data S1 [file peerj-07-8040-s001.xls]

## Sheet: Raw Data
TA	colony 1	colony 2	colony 3
Non-enriched/400ppmv	1922	1928	1930					DIC	CO32-	HCO3-	CO2
Nutrient-enriched/400ppmv	1924	1935	1930			Non-enriched/400ppmv	colony 1	1775.18	106.713	1654.3	14.1704
Non-enriched/400ppmv	1942	1937	1930				colony 2	1802.92	90.9196	1694.55	17.4512
Nutrient-enriched/400ppmv	1946	1940	1937				colony 3	1771.52	108.841	1648.88	13.8025
						Nutrient-enriched/400ppmv	colony 1	1781.66	104.788	1662.3	14.5706
							colony 2	1763.1	115.623	1634.71	12.7706
							colony 3	1785.23	102.726	1667.55	14.9571
pH	colony 1	colony 2	colony 3			Non-enriched/800ppmv	colony 1	1879.24	56.5946	1791.32	31.3287
Non-enriched/400ppmv	8.01	8.1	8.07				colony 2	1897.38	48.7111	1811.45	37.2216
Nutrient-enriched/400ppmv	8.07	8.02	8.13				colony 3	1881.88	55.4005	1794.37	32.113
Non-enriched/400ppmv	7.71	7.78	7.77			Nutrient-enriched/800ppmv	colony 1	1881.51	57.9642	1792.91	30.6427
Nutrient-enriched/400ppmv	7.76	7.81	7.77				colony 2	1876.13	60.4788	1786.49	29.1588
							colony 3	1889.45	54.3719	1802.07	33.002
		RGR	Net photosynthesis rate	Chl a	Chl c	soluble carbohydrates	soluble protein
Non-enriched/400ppmv	colony 1	0.971702	0.285002	0.487687	0.0533048	3.8696	2.28944
	colony 2	0.910321	0.27837	0.458676	0.0543661	4.13125	2.03026
	colony 3	0.939097	0.291633	0.431865	0.0560367	3.60795	3.19657
Nutrient-enriched/400ppmv	colony 1	1.38073	0.417525	0.411496	0.054889	3.81875	5.01084
	colony 2	1.41539	0.364933	0.477916	0.0682445	3.50625	4.36289
	colony 3	1.45341	0.312341	0.444506	0.0613567	4.31875	4.2333
Non-enriched/800ppmv	colony 1	0.501739	0.180058	0.308004	0.0585373	4.00625	1.77107
	colony 2	0.40019	0.327579	0.318437	0.0396674	3.94375	1.56393
	colony 3	0.449838	0.253818	0.29897	0.0488023	3.31875	0.993529
Nutrient-enriched/800ppmv	colony 1	0.769674	0.215493	0.408614	0.0437826	2.69375	3.32616
	colony 2	0.739024	0.241235	0.403927	0.0384095	2.9125	2.41903
	colony 3	0.70268	0.266977	0.39964	0.0400961	3.13125	3.32616
